# Supplementary material for: Predicting Patterns of Distant Metastasis in Breast Cancer Patients following Local Regional Therapy Using Machine Learning
Source: MDPI journal article supplement (doi:10.3390/genes14091768), 2023-09-07
Supplement: s1 [file s1]

# Supplementary Materials:

**Table S1.** Clinicopathological characteristics of patient cohorts grouped by the site of first distant metastasis. Sites of distant metastasis were classified as bone, brain and visceral (lung, liver, organs of the mediastinum).

Chemotherapy treatment was grouped as follows: Anthracycline backbone alone (AC, FEC, FEC100), anthracycline-taxane backbone (ACD, ACT, FECD, FECT), other (paclitaxel, docetaxel, capecitabine, TC) and unknown. Abbreviations: T stage, tumour size; N stage, nodal status; M stage, metastasis; G1, Nottingham grade 1; G2, Nottingham grade 2; G3, Nottingham grade 3; SD, standard deviation; ER+, estrogen receptor positive; PR+, progesterone receptor positive; HER2+, human epidermal growth factor positive; TNBC, triple-negative breast cancer; LVI, lymphovascular invasion; NA, not available.

| Clinicopathological Characteristics | Bone Metastasis (n=99) | Brain Metastasis (n= 55) | Visceral Metastasis (n=21) |
|-------------------------------------|------------------------|--------------------------|----------------------------|
| <b>a) Pre-surgical</b>              |                        |                          |                            |
| Age                                 |                        |                          |                            |
| Mean Age±SD years                   | 56.23±13.62            | 54.02±12.35              | 56.52±14.84                |
| 20-39 years                         | 9 (9%)                 | 9 (16%)                  | 3 (14%)                    |
| 40-49 years                         | 29 (29%)               | 13 (24%)                 | 3 (14%)                    |
| 50-59 years                         | 22 (22%)               | 14 (25%)                 | 7 (33%)                    |
| 60-69 years                         | 20 (20%)               | 16 (29%)                 | 2 (10%)                    |
| ≥70 years                           | 19 (19%)               | 3 (6%)                   | 6 (29%)                    |
| Laterality                          |                        |                          |                            |
| Left                                | 47 (47%)               | 33 (60%)                 | 13 (62%)                   |
| Right                               | 52 (52%)               | 22 (40%)                 | 8 (38%)                    |
| <b>b) Surgical Pathology</b>        |                        |                          |                            |
| Surgical Procedure                  |                        |                          |                            |
| Lumpectomy                          | 70 (71%)               | 36 (65%)                 | 16 (76%)                   |
| Mastectomy                          | 29 (29%)               | 19 (35%)                 | 5 (24%)                    |
| T Stage                             |                        |                          |                            |
| Mean size±SD (mm)                   | 32.30±18.41            | 32.24±19.21              | 25.98±19.51                |
| T1                                  | 22 (22%)               | 14 (25%)                 | 10 (48%)                   |
| T2                                  | 63 (64%)               | 33 (60%)                 | 10 (48%)                   |
| T3                                  | 13 (13%)               | 7 (13%)                  | 1 (5%)                     |
| T4                                  | 1 (1%)                 | 1 (2%)                   | 0 (0%)                     |
| N Stage                             |                        |                          |                            |
| N0                                  | 22 (22%)               | 21 (38%)                 | 9 (43%)                    |
| N1                                  | 44 (44%)               | 14 (25%)                 | 6 (29%)                    |
| N2                                  | 20 (20%)               | 13 (24%)                 | 3 (14%)                    |
| N3                                  | 13 (13%)               | 7 (13%)                  | 3 (14%)                    |
| Nottingham Grade                    |                        |                          |                            |
| G1                                  | 8 (8%)                 | 1 (2%)                   | 3 (14%)                    |
| G2                                  | 36 (36%)               | 15 (27%)                 | 5 (24%)                    |
| G3                                  | 54 (55%)               | 39 (71%)                 | 13 (62%)                   |
| NA                                  | 1(1%)                  | 0 (0%)                   | 0 (0%)                     |
| Receptor Status                     |                        |                          |                            |
| ER+                                 | 77 (78%)               | 23 (42%)                 | 12 (57%)                   |
| PR+                                 | 76 (77%)               | 22 (40%)                 | 11 (52%)                   |
| HER2+                               | 13 (13%)               | 16 (29%)                 | 5 (24%)                    |

|                               |               |             |             |
|-------------------------------|---------------|-------------|-------------|
| Subtype                       |               |             |             |
| Luminal A                     | 67 (38%)      | 16 (9%)     | 9 (5%)      |
| Luminal B                     | 10 (6%)       | 7 (4%)      | 3 (3%)      |
| HER2 Enriched                 | 3 (3%)        | 9 (5%)      | 2 (1%)      |
| TNBC                          | 19 (11%)      | 23 (13%)    | 7 (4%)      |
| LVI Status                    |               |             |             |
| LVI-                          | 38 (38%)      | 30 (55%)    | 8 (38%)     |
| LVI+                          | 54 (53%)      | 20 (36%)    | 12 (57%)    |
| NA                            | 8 (8%)        | 5 (9%)      | 1 (5%)      |
| <b>c) Adjuvant Treatments</b> |               |             |             |
| Chemotherapy                  | n= 73 (74%)   | n= 46 (84%) | n= 16 (76%) |
| Anthracycline backbone alone  | 6 (6%)        | 3 (5%)      | 0 (0%)      |
| Anthracycline-Taxane backbone | 56 (57%)      | 35 (64%)    | 10 (48%)    |
| Other                         | 2 (2%)        | 2 (4%)      | 6 (29%)     |
| Unknown                       | 9 (9%)        | 6 (11%)     | 0 (0%)      |
| Endocrine Therapy             | (n= 45 (45%)) | n= 25 (45%) | n= 10 (47%) |
| Aromatase Inhibitors          | 29 (29%)      | 8 (16%)     | 6 (29%)     |
| Tamoxifen                     | 9 (9%)        | 12 (22%)    | 2 (10%)     |
| Unknown                       | 7 (7%)        | 5 (9%)      | 2 (10%)     |
| Trastuzumab                   | 34 (34%)      | 10 (18%)    | 4 (19%)     |

**Table S2.** Clinicopathological characteristics of patient cohorts grouped by the time in years until first distant metastasis. Chemotherapy treatment was grouped as follows: Anthracycline backbone alone (AC, FEC, FEC100), Anthracycline-Taxane backbone (ACD, ACT, FECD, FECT), other (paclitaxel, docetaxel, capecitabine, TC). and unknown. Abbreviations: T stage, tumour size; N stage, nodal status; M stage, metastasis; G1, Nottingham grade 1; G2, Nottingham grade 2; G3, Nottingham grade 3; SD, standard deviation; ER+, estrogen receptor-positive; PR+, progesterone receptor-positive; HER2+, human epidermal growth factor positive; TNBC, triple-negative breast cancer; LVI, lymphovascular invasion; NA, not available.

| Clinicopathological Characteristics | ≤1 year (n=22) | >1-≤2 years (n=40) | >2-≤3 years (n=33) | >3-≤4 years (n=21) | >4-≤5 years (n=22) | >5 years (n=37) |
|-------------------------------------|----------------|--------------------|--------------------|--------------------|--------------------|-----------------|
| <b>a) Pre-surgical</b>              |                |                    |                    |                    |                    |                 |
| Age                                 |                |                    |                    |                    |                    |                 |
| Mean Age±SD years                   | 58.50±16.49    | 52.98±13.80        | 59.09±12.90        | 56.33±10.22        | 55.27±11.54        | 53.24±13.53     |
| <50 years                           | 9 (41%)        | 19 (28%)           | 10 (30%)           | 5 (24%)            | 9 (42%)            | 14 (38%)        |
| Laterality                          |                |                    |                    |                    |                    |                 |
| Left                                | 13 (59%)       | 27 (68%)           | 9 (27%)            | 9 (43%)            | 13 (59%)           | 22 (59%)        |
| Right                               | 9 (41%)        | 13 (33%)           | 24 (73%)           | 12 (57%)           | 9 (41%)            | 15 (41.5%)      |
| <b>b) Surgical Pathology</b>        |                |                    |                    |                    |                    |                 |
| Surgical Procedure                  |                |                    |                    |                    |                    |                 |
| Lumpectomy                          | 13 (59%)       | 27 (68%)           | 28 (85%)           | 13 (62%)           | 14 (64%)           | 27 (73%)        |
| Mastectomy                          | 9 (41%)        | 13 (33%)           | 5 (15%)            | 8 (38%)            | 8 (36%)            | 10 (27%)        |
| T Stage                             |                |                    |                    |                    |                    |                 |
| Mean size±SD (mm)                   | 32.33±14.87    | 26.95±28.92        | 28.39±14.98        | 24.43±11.66        | 38.18±24.97        | 27.93±17.66     |
| T1                                  | 4 (18%)        | 5 (13%)            | 10 (30%)           | 8 (38%)            | 5 (23%)            | 14 (38%)        |
| T2                                  | 15 (68%)       | 28 (70%)           | 22 (67%)           | 12 (57%)           | 12 (55%)           | 17 (46%)        |
| T3                                  | 2 (9%)         | 7 (18%)            | 1 (3%)             | 1 (5%)             | 4 (18%)            | 6 (16%)         |

|                               |               |             |             |             |             |             |
|-------------------------------|---------------|-------------|-------------|-------------|-------------|-------------|
| T4                            | 1 (5%)        | 0 (0%)      | 0 (0%)      |             | 1 (5%)      | 0 (0%)      |
| N Stage                       |               |             |             |             |             |             |
| N0                            | 5 (23%)       | 9 (23%)     | 13 (39%)    | 3 (14%)     | 8 (36%)     | 14 (38%)    |
| N1                            | 7 (32)        | 18 (45%)    | 12 (36%)    | 12 (57%)    | 4 (18%)     | 11 (30%)    |
| N2                            | 5 (23%)       | 10 (25%)    | 5 (15%)     | 2 (10%)     | 5 (23%)     | 18 (49%)    |
| N3                            | 5 (23%)       | 3 (8%)      | 3 (9%)      | 4 (19%)     | 5 (23%)     | 3 (8%)      |
| M Stage                       |               |             |             |             |             |             |
| M0                            | 22 (100%)     | 40 (100%)   | 33 (100%)   | 21 (100%)   | 22 (100%)   | 37 (100%)   |
| Nottingham Grade              |               |             |             |             |             |             |
| G1                            | 3 (14%)       | 0 (0%)      | 2 (6%)      | 1 (5%)      | 2 (9%)      | 4 (11%)     |
| G2                            | 4 (18%)       | 12 (30%)    | 6 (18%)     | 7 (33%)     | 11 (50%)    | 16 (43%)    |
| G3                            | 15 (68%)      | 28 (70%)    | 25 (76%)    | 12 (57%)    | 9 (41%)     | 17 (46%)    |
| NA                            | 0 (0%)        | 0 (0%)      | 0 (0%)      | 1 (5%)      | 0 (0%)      |             |
| Receptor Status               |               |             |             |             |             |             |
| ER+                           | 6 (27%)       | 16 (40%)    | 21 (64%)    | 18 (86%)    | 20 (91%)    | 31 (84%)    |
| PR+                           | 6 (27%)       | 15 (38%)    | 21 (64%)    | 18 (86%)    | 19 (86%)    | 30 (81%)    |
| HER2+                         | 4 (18%)       | 9 (23%)     | 3 (9%)      | 3 (14%)     | 5 (23%)     | 10 (27%)    |
| Subtype                       |               |             |             |             |             |             |
| Luminal A                     | 6 (27%)       | 12 (30%)    | 19 (58%)    | 16 (76%)    | 16 (73%)    | 23 (62%)    |
| Luminal B                     | 0 (0%)        | 4 (10%)     | 2 (6%)      | 2 (10%)     | 4 (18%)     | 8 (22%)     |
| HER2 Enriched                 | 4 (18%)       | 5 (13%)     | 1 (3%)      | 1 (4%)      | 1(4%)       | 2 (5%)      |
| TNBC                          | 12 (55%)      | 19 (23%)    | 11 (33%)    | 2 (10%)     | 1(4%)       | 4 (11%)     |
| LVI Status                    |               |             |             |             |             |             |
| LVI-                          | 10 (45%)      | 22 (55%)    | 13 (39%)    | 7 (33)      | 9 (41%)     | 16 (43%)    |
| LVI+                          | 12 (55%)      | 15 (38%)    | 17 (52%)    | 12 (57%)    | 11 (50%)    | 17 (46%)    |
| NA                            | 0 (0%)        | 3 (8%)      | 3 (9%)      | 2 (10%)     | 2 (9%)      | 4 (11%)     |
| <b>c) Adjuvant Treatments</b> |               |             |             |             |             |             |
| Chemotherapy                  | N=16<br>(73%) | N= 32 (80%) | N= 23 (70%) | N= 18 (86%) | N= 15 (68%) | N= 31 (84%) |
| Anthracycline backbone alone  | 0 (0%)        | 2 (5%)      | 2 (6%)      | 1 (5%)      | 0 (0%)      | 4 (11%)     |
| Anthracycline-Taxane backbone | 14 (64%)      | 26 (65%)    | 16 (48%)    | 12 (57)     | 11 (50%)    | 22 (59%)    |
| Other                         | 2 (9%)        | 1 (3%)      | 1 (3%)      | 3 (14%)     | 2 (9%)      | 1 (3%)      |
| Unknown                       | 0 (0%)        | 3 (8%)      | 4 (12%)     | 2 (10%)     | 2 (9%)      | 4 (11%)     |
| Endocrine Therapy             | N=10<br>(45%) | N=15 (38%)  | N= 18 (55%) | N= 16 (76%) | N= 19 (86%) | N= 27 (73%) |
| Aromatase Inhibitors          | 4 (18%)       | 4 (1%)      | 7 (21%)     | 10 (48%)    | 5 (23%)     | 13 (35%)    |
| Tamoxifen                     | 3 (14%)       | 8 (20%)     | 8 (24%)     | 5 (24%)     | 11 (50%)    | 13 (35%)    |
| Unknown                       | 3 (14%)       | 3 (8%)      | 3 (9%)      | 1 (5%)      | 3 (14%)     | 1 (3%)      |
| Trastuzumab                   | 4 (18%)       | 8 (20%)     | 1 (3%)      | 2 (10%)     | 2 (9%)      | 6 (16%)     |

**Table S3:** Distribution of first distant metastatic site over time. Sites of distant metastasis were classified as bone, brain and visceral (lung, liver, organs of the mediastinum). Abbreviations: DM, distant metastasis.

| Site of DM      | ≤1 year<br>(n=22) | >1-≤2 years<br>(n=40) | >2-≤3 years<br>(n=33) | >3-≤4 years<br>(n=21) | >4-≤5 years<br>(n=22) | >5 years<br>(n=37) |
|-----------------|-------------------|-----------------------|-----------------------|-----------------------|-----------------------|--------------------|
| <b>Bone</b>     | 8 (36%)           | 21 (53%)              | 20 (61%)              | 17 (81%)              | 15 (68%)              | 18 (49%)           |
| <b>Brain</b>    | 11 (50%)          | 13 (33%)              | 9 (27%)               | 3 (14%)               | 5 (23%)               | 14 (38%)           |
| <b>Visceral</b> | 3 (14%)           | 6 (15%)               | 4 (12%)               | 1 (5%)                | 2 (9%)                | 5 (14%)            |

**Table S4:** Average time in months to first distant metastasis for each site. Sites of distant metastasis were classified as bone, brain and visceral (lung, liver, organs of the mediastinum).

|                                   | <b>Bone Metastasis<br/>(n=99)</b> | <b>Brain Metastasis<br/>(n= 55)</b> | <b>Visceral Metastasis<br/>(n=21)</b> |
|-----------------------------------|-----------------------------------|-------------------------------------|---------------------------------------|
| Average Time to first DM (months) | 41.92±25.48                       | 41.51±35.61                         | 36.44± 25.74                          |
| Median Time to first DM (months)  | 37.58                             | 31.30                               | 30.58                                 |

**Table S5:** Frequency of metastatic site and average time to metastasis according to subtype. Sites of distant metastasis were classified as bone, brain and visceral (lung, liver, organs of the mediastinum). Subtypes were grouped as follows: Luminal A (ER+, PR+, HER2-), Luminal B (ER+, PR+/-, HER2+), HER2 Enriched (ER-, PR-, HER2+), TNBC (ER-, PR-, HER2-).

| Site of DM                               | <b>Luminal A (n= 92)</b> | <b>Luminal B (n= 20)</b> | <b>HER2 Enriched (n= 14)</b> | <b>TNBC (n= 49)</b> |
|------------------------------------------|--------------------------|--------------------------|------------------------------|---------------------|
| <b>Bone (% of subtype)</b>               | <b>67 (72%)</b>          | <b>10 (50%)</b>          | 3 (21%)                      | 19 (39%)            |
| <b>Brain (% of subtype)</b>              | 16 (17%)                 | 7 (35%)                  | <b>9 (64%)</b>               | <b>23 (47%)</b>     |
| <b>Visceral (% of subtype)</b>           | 9 (10%)                  | 3 (15%)                  | 2 (14%)                      | 7 (14%)             |
| <b>Average Time to first DM (months)</b> | 47.77                    | 54.53                    | 30.33                        | 26.30               |
